# Supplementary material for: Identification of a novel aminopolycarboxylic acid siderophore gene cluster encoding the biosynthesis of ethylenediaminesuccinic acid hydroxyarginine (EDHA)
Source: Royal Society of Chemistry journal article supplement (doi:10.1039/c8mt00009c), 2018-01-01
Supplement: c8mt00009c1.pdf [file c8mt00009c1.pdf]

- 1    **Supplementary file**
- 2    **Identification of a novel aminopolycarboxylic acid siderophore gene cluster encoding the**
- 3    **biosynthesis of ethylenediaminesuccinic acid hydroxyarginine (EDHA)**

4 **Table S1**

5 Primer list.

| Primer      | Sequence (5' - 3')   |
|-------------|----------------------|
| sigB-RT-FP  | CTCTGTCATGGCGCTCATTG |
| sigB-RT-RP  | TCAGCGTCACACCCTCTTCC |
| 00507-RT-FP | AGGCCAACGAGAGCGACTAC |
| 00507-RT-RP | GTGAACCGCCAGGTCTTCAG |
| 00506-RT-FP | CGGCCTGTTGGCCGAAGTCC |
| 00506-RT-RP | GACCAGTGGTCGGGTGTGGG |
| 00505-RT-FP | ACATCTCGCTGACCGATGTG |
| 00505-RT-RP | GTCTTGATCGCGACGACTCC |
| 00504-RT-FP | CGTGTACTACGCCAAGAAGG |
| 00504-RT-RP | TGGATGTCGTAGCCGGAGAG |
| 00503-RT-FP | ACGGCGAAGATACGCATGGC |
| 00503-RT-RP | TTGTCCTTGGACGCGTGGTG |
| 00502-RT-FP | CCTCGCCATGGTGATCTTC  |
| 00502-RT-RP | AGCCCGATGAGCACCATCAG |

6

## 7 Table S2

8 List of 50 genes used for the multilocus sequence analysis.

| Model ID     | Description                                                 |
|--------------|-------------------------------------------------------------|
| Ribosomal_S8 | Ribosomal protein S8                                        |
| TIGR00020    | peptide chain release factor 2                              |
| TIGR00060    | ribosomal protein uL18                                      |
| TIGR00065    | cell division protein FtsZ                                  |
| TIGR00092    | GTP-binding protein YchF                                    |
| TIGR00263    | tryptophan synthase, beta subunit                           |
| TIGR00302    | phosphoribosylformylglycinamide synthase, purS protein      |
| TIGR00343    | pyridoxal 5'-phosphate synthase, synthase subunit Pdx1      |
| TIGR00431    | tRNA pseudouridine(55) synthase                             |
| TIGR00482    | nicotinate (nicotinamide) nucleotide adenyltransferase      |
| TIGR00615    | recombination protein RecR                                  |
| TIGR00647    | DNA-binding protein WhiA                                    |
| TIGR00959    | signal recognition particle protein                         |
| TIGR00962    | ATP synthase F1, alpha subunit                              |
| TIGR00981    | ribosomal protein uS12                                      |
| TIGR01009    | ribosomal protein uS3                                       |
| TIGR01011    | ribosomal protein uS2                                       |
| TIGR01021    | ribosomal protein uS5                                       |
| TIGR01029    | ribosomal protein uS7                                       |
| TIGR01032    | ribosomal protein bL20                                      |
| TIGR01039    | ATP synthase F1, beta subunit                               |
| TIGR01044    | ribosomal protein uL22                                      |
| TIGR01049    | ribosomal protein uS10                                      |
| TIGR01050    | ribosomal protein uS19                                      |
| TIGR01059    | DNA gyrase, B subunit                                       |
| TIGR01067    | ribosomal protein uL14                                      |
| TIGR01134    | amidophosphoribosyltransferase                              |
| TIGR01137    | cystathionine beta-synthase                                 |
| TIGR01162    | phosphoribosylaminoimidazole carboxylase, catalytic subunit |
| TIGR01164    | ribosomal protein uL16                                      |
| TIGR01169    | ribosomal protein uL1                                       |
| TIGR01171    | ribosomal protein uL2                                       |
| TIGR01393    | elongation factor 4                                         |
| TIGR01632    | ribosomal protein uL11                                      |
| TIGR01737    | phosphoribosylformylglycinamide synthase I                  |
| TIGR01795    | chorismate mutase                                           |
| TIGR01919    | bifunctional HisA/TrpF protein                              |
| TIGR01966    | ribonuclease PH                                             |
| TIGR01978    | FeS assembly ATPase SufC                                    |
| TIGR01980    | FeS assembly protein SufB                                   |
| TIGR02012    | protein RecA                                                |
| TIGR02013    | DNA-directed RNA polymerase, beta subunit                   |
| TIGR02075    | UMP kinase                                                  |
| TIGR02729    | Obg family GTPase CgtA                                      |
| TIGR03188    | phosphoribosyl-ATP diphosphatase                            |
| TIGR03631    | ribosomal protein uS13                                      |
| TIGR03632    | ribosomal protein uS11                                      |
| TIGR03687    | ubiquitin-like protein Pup                                  |
| TIGR03689    | proteasome ATPase                                           |
| TIGR03800    | pyridoxal 5'-phosphate synthase, glutaminase subunit Pdx2   |

10 **Table S3**

11 Predicted member genes of the IdeR regulon in *Streptomyces* sp. MA5143a.

| Locus Tag      | ORF predicted funtion                                       | Predicted IdeR-binding site |
|----------------|-------------------------------------------------------------|-----------------------------|
| MA_5143a_00220 | Aconitase                                                   | CTAACTTAGCCTTACCTTA         |
| MA_5143a_00439 | Iron-sulfur protein                                         | TAAGGTAAGCCTTACTTGG         |
| MA_5143a_00506 | L-Arginine oxygenase                                        | TTAGGTAAGCCTTGCCTGT         |
| MA_5143a_00507 | ABC transporter substrate-binding protein                   | GTAGGTAAGGCTAAGCAAA         |
| MA_5143a_01430 | ABC transporter ATP-binding protein                         | TTAGGTAAGCCTCATCTGA         |
| MA_5143a_01665 | Iron-sulfur protein                                         | TAAGGTTAGGTTAGCCTCA         |
| MA_5143a_02245 | Iron ABC transporter permease                               | GGAGGATAGGCTAACCTAA         |
| MA_5143a_02253 | ABC transporter substrate-binding protein                   | TTCGGTAAGGCTTGCCTTA         |
| MA_5143a_02603 | Siderophore-interacting protein                             | TTAGGTTAGCCTCACCTAA         |
| MA_5143a_03356 | NIS gene cluster: siderophore biosynthesis protein          | GGAGGTAAGCCTTACCTTA         |
| MA_5143a_04078 | Iron ABC transporter substrate-binding protein              | TTAGGCAAGGTTTACCTTA         |
| MA_5143a_04108 | NIS gene cluster: pyridoxal-dependent decarboxylase         | TTAGGTTAGGCTAACCTAA         |
| MA_5143a_04110 | NIS gene cluster: ABC transporter substrate-binding protein | TGAGGTTAGGCTAACCTAT         |
| MA_5143a_05694 | Putative heme-iron utilisation protein                      | TTAGGCAAGGCTTACCTAA         |
| MA_5143a_06959 | Heme oxygenase                                              | TTAGGTAAGCCTAACCATC         |

12

**Table S4**

Comparison of the NIS gene cluster MA\_5143a\_04105 to MA\_5143a\_04110 and the desferrioxamine gene cluster (MiBiG entry BGC0000940) of *Streptomyces coelicolor*.

| Locus Tag      | <i>S. coelicolor</i> M145<br>Desferrioxamine biosynthesis enzymes | % amino acid<br>identity | ORF predicted funtion                     |
|----------------|-------------------------------------------------------------------|--------------------------|-------------------------------------------|
| MA_5143a_04110 | DesE (Accession number: CAB87217)                                 | 73                       | ABC transporter substrate-binding protein |
| MA_5143a_04109 | DesF (Accession number: CAB87218)                                 | 72                       | Siderophore reductase                     |
| MA_5143a_04108 | DesA (Accession number: CAB87219)                                 | 86                       | Pyridoxal-dependent decarboxylase         |
| MA_5143a_04107 | DesB (Accession number: CAB87220)                                 | 78                       | Monooxygenase                             |
| MA_5143a_04106 | DesC (Accession number: CAB87221)                                 | 80                       | Acetyltranferase                          |
| MA_5143a_04105 | DesD (Accession number: CAB87222)                                 | 82                       | Siderophore synthetase                    |

30 **Table S4**

31 Predicted IdeR-binding motifs upstream of *vioC*-like genes.

| Organisms                                 | Locus Tag      | Predicted IdeR-binding site |
|-------------------------------------------|----------------|-----------------------------|
| <i>Streptomyces</i> sp. MA5143a           | MA_5143a_00506 | TTAGGTAAGCCTTGCCTGT         |
| <i>Streptomyces avermitilis</i>           | SAV_5618       | TTAGGTATGCCTAACCTAA         |
| <i>Streptomyces scabies</i>               | SCAB_5271      | TTAGGTAAGCCTTGCTTAA         |
| <i>Corynebacterium pseudotuberculosis</i> | ADL_10105      | AAAGGTTAGCCTCACCTCC         |
| <i>Corynebacterium ulcerans</i>           | AIU_32258      | AAAGGTTAGCCTCACCTTC         |
| <i>Nocardia brasiliensis</i>              | AFU_05325      | TTAGGTAAGCCTTGCTTAA         |

32

33 **Figure S1**

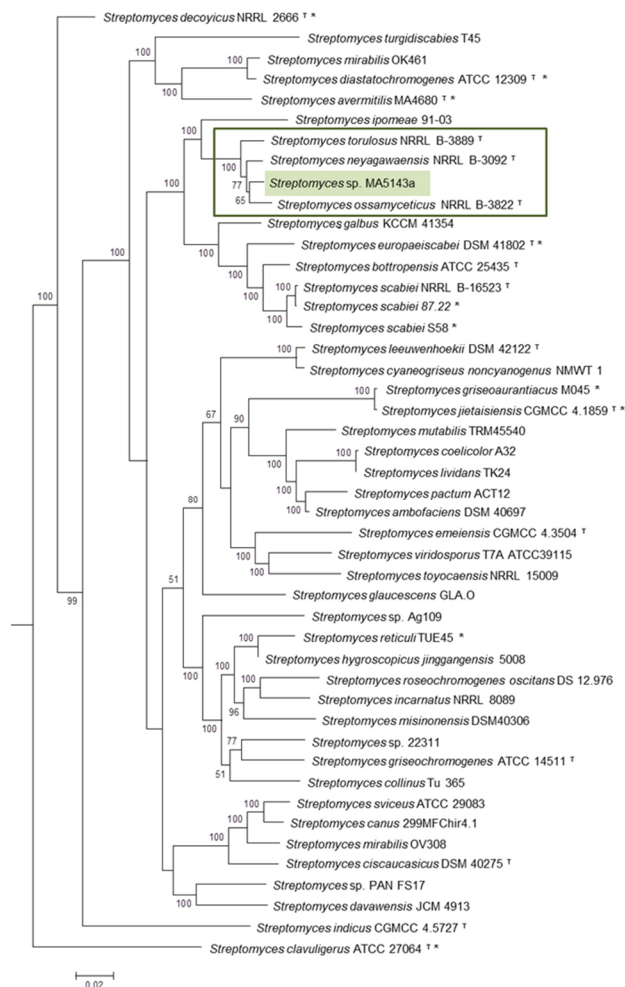

34  
35 **Phylogenetic tree allocating *Streptomyces* sp. MA5143a in the *Streptomyces* genera.** Maximum  
36 likelihood tree based on 50 housekeeping genes showing *Streptomyces* sp. MA5143a (marked in green)  
37 and its relatives. Strains with verified EDHA cluster in their genome are marked by asterisks. Numbers  
38 at branch points indicate bootstrap percentages (based on 1000 replicates); only values >50 % are  
39 shown. Bar, 0.02 substitutions per nucleotide position; T, indicates type strains.

**Figure S2**

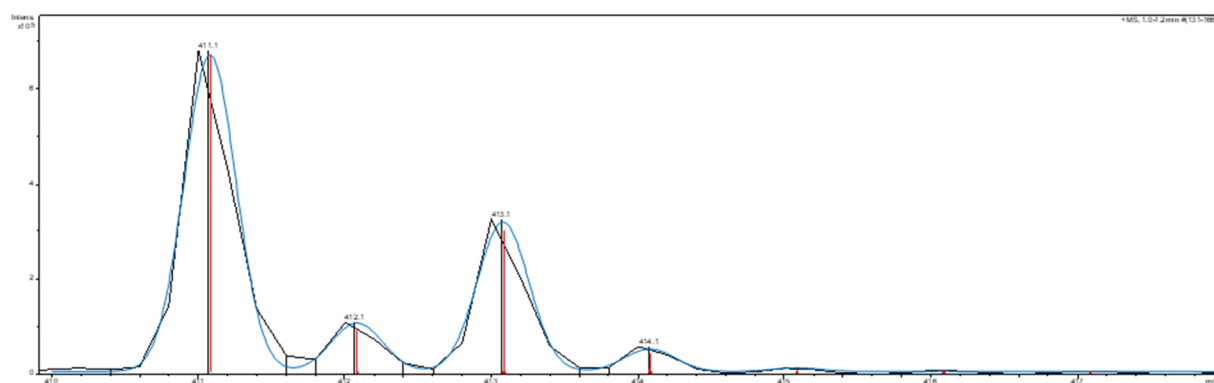

**Overlay of measured isotope pattern of the putative EDHA copper adduct and calculated isotope pattern for  $C_{12}H_{22}N_5O_7Cu$ .** The calculated (blue) and the measured (black) isotope pattern match well, confirming the presence of Cu in the complex. Due to the limited mass resolution of the ion trap used, isotope peaks arising from  $^{65}Cu/^{13}C_2/^{13}C^{15}N$  etc. cannot be distinguished. The isotope pattern has been calculated using the software Universal Mass Calculator 3.7.



58

59

60

61

62

63

64

65

66

**Figure S3**

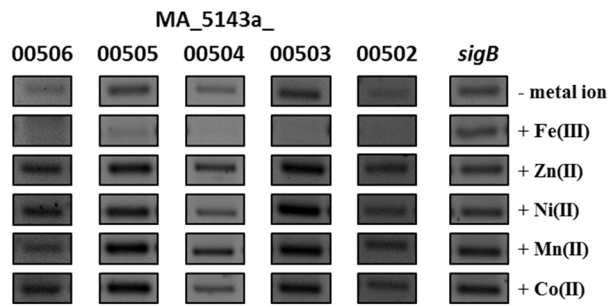

**Trace metal-dependent transcriptional pattern of MA\_5143a\_00502 – MA\_5143a\_00506.** The gene names are indicated at the top of the gels. Cultures were grown in production media supplemented with no additional ion, 60 mg L<sup>-1</sup> Fe(III)citrate or 25 µM ZnSO<sub>4</sub>, NiSO<sub>4</sub>, MnSO<sub>4</sub> or CoSO<sub>4</sub> and samples were taken after 72 h of incubation to isolate RNA. *sigB* was used as a housekeeping gene to normalize the cDNA.
